1 **The implications of using maternity care deserts to measure**  
2 **progress in access to obstetric care: A mixed-integer**  
3 **optimization analysis.**  
4

5 **Meghan E. Meredith, BS**

6 H. Milton Stewart School of Industrial and Systems Engineering

7 Georgia Institute of Technology

8 Atlanta, Georgia, USA

9

10 **Lauren N. Steimle, PhD\***

11 H. Milton Stewart School of Industrial and Systems Engineering

12 Georgia Institute of Technology

13 Atlanta, Georgia, USA

14

15 **Stephanie M. Radke, MD, MPH**

16 Department of Obstetrics & Gynecology

17 University of Iowa Hospitals & Clinics

18 Iowa City, Iowa, USA

19 **Abstract**

20

21 **Background:** Among the factors contributing to the maternal mortality crisis in the  
22 United States is a lack of risk-appropriate access to obstetric care. There are several  
23 existing measures of access to obstetric care in the literature and popular media. In this  
24 study, we explored how current measures of obstetric access inform the number and  
25 location of additional obstetric care facilities required to improve access.

26

27 **Methods:** We formulated two facility location optimization models to determine the  
28 number of new facilities required to minimize the number of reproductive-aged women  
29 living in obstetric care deserts. We define deserts as either “maternity care deserts”,  
30 designated by the March of Dimes to be counties with no obstetric care hospital or  
31 obstetric providers, or regions further than 50 miles from critical care obstetric (CCO)  
32 services. We gathered information on hospitals with obstetric services from Georgia  
33 Department of Public Health public reports and estimated the female reproductive-age  
34 population by census block group using the American Community Survey.

35

36 **Results:** Out of the 1,910,308 reproductive-aged women who live in Georgia, 104,158  
37 (5.5%) live in maternity care deserts, 150,563 (7.9%) reproductive-aged women live  
38 further than 50 miles from CCO services, and 38,202 (2.0%) live in both “maternity care  
39 desert” and further than 50 miles from CCO services. Our optimization analysis  
40 suggests that 16 new obstetric facilities (a 19% increase from the current 83 facilities)  
41 are required to reduce the number of reproductive-aged women living in “maternity care  
42 deserts” by 50% (from 104,158 to 51,477). At least 56 new obstetric care facilities (a

43 67% increase) would be required to eliminate maternity care deserts in Georgia.  
44 Meanwhile, expansion of 2 obstetric care facilities to offer CCO services would reduce  
45 the number of reproductive-aged women living further than 50 miles from CCO services  
46 by 50% (from 150,563 to 57,338), and 8 facilities would ensure all women in Georgia  
47 live within 50 miles of CCO services.

48

49 **Conclusions:** Current measures of access to obstetric care may not be sufficient for  
50 evaluating access and tracking progress toward improvements. In a state like Georgia  
51 with a large number of small counties, eliminating maternity care deserts would require  
52 a prohibitively large number of new obstetric care facilities. This work suggests that  
53 additional measures and tools are needed to estimate the number and type of obstetric  
54 care facilities that best match practical resources to obstetric care needs.

## 55 **1. Background**

56 The maternal mortality rate in the United States, 32.9 deaths per 100,000 live births as  
57 of 2021, is the highest among developed countries and has increased by 89% since  
58 2018.<sup>1,2</sup> There is evidence that upwards of 80% of maternal deaths in the US are  
59 preventable.<sup>3</sup> Among the factors contributing to the maternal mortality crisis in the  
60 United States is a lack of access to risk-appropriate care and an undersupply of  
61 maternal healthcare providers.<sup>2</sup>

62  
63 The lack of spatial access has been worsening in recent years. Over half of rural  
64 counties did not have a hospital offering obstetric services in 2014, and this number  
65 grew by 2.7% from 2014 to 2018.<sup>4</sup> Administrators cite financial concerns, shortages of  
66 obstetric professionals, and low volume as reasons for closing their obstetric units.<sup>5,6</sup>  
67 Lack of access to obstetric services is associated with adverse maternal outcomes,  
68 adverse neonatal outcomes, and prenatal stress.<sup>7-11</sup> Recent findings suggest a lack of  
69 access and disparities in spatial access will persist unless facility-level infrastructure is  
70 expanded.<sup>12</sup> However, spatial access to obstetric care is measured in several ways,  
71 which causes uncertainty about how to optimally invest in infrastructure to expand  
72 access. One common measure of access in the academic literature and news media is  
73 the “maternity care desert”.<sup>13,14</sup> The March of Dimes categorizes counties with a lack of  
74 access to care (no hospital or birth center offering obstetric care and no obstetric  
75 providers) as “maternity care deserts”. As of 2022, more than 2.2 million reproductive-  
76 aged women in the U.S. live in “maternity care deserts”.<sup>15</sup> Studies have shown that  
77 pregnant women who live in “maternity care deserts” have higher rates of infant and

78 maternal mortality.<sup>16,17</sup> Other studies have measured spatial access as driving time to  
79 the nearest hospital offering obstetric services at different levels of care<sup>12,18</sup> and  
80 distance to the nearest hospital offering critical care obstetric (CCO) services<sup>19,20</sup> as key  
81 measures for quantifying potential access.

82  
83 In contrast to these existing studies that measure current levels of access, we consider  
84 the implications of using these metrics as key performance indicators for tracking  
85 improvements in access to obstetric care. In particular, we ask: (1) What is required for  
86 states to reduce the number of women living in obstetric care deserts? (2) Is reducing  
87 obstetric care deserts in line with the broader goals of promoting optimal maternal  
88 outcomes? To answer these questions, we consider the implications of expanding  
89 access to care through facility expansions by drawing upon *mathematical optimization*.  
90 Optimization is a mathematical science that is widely used to identify the ideal solution  
91 while considering the complex interactions and constraints within a system.<sup>21</sup> The  
92 specific type of optimization modeling framework, facility location modeling, has often  
93 been used to evaluate the ideal placement of healthcare facilities to ensure proper  
94 coverage of a patient population.<sup>22–24</sup> A comprehensive review of healthcare facility  
95 location modeling is provided by Admadi-Javid et al.<sup>25</sup>

96  
97 In this article, we characterize access to obstetric care using existing access measures  
98 and evaluate these existing measures by determining how many facilities are needed to  
99 provide a sufficient level of access according to these measures. We focus on the State  
100 of Georgia because Georgia has one of the highest rates of maternal mortality in the US

101 – almost twice as high as the national rate.<sup>26</sup> As of 2019 more than 75% of Georgia’s  
102 159 counties had no hospital or birth center offering obstetric care.<sup>15</sup> Georgia does have  
103 a set of Regional Perinatal Centers whose mission is to coordinate access to optimal  
104 and risk-appropriate maternal and infant care.<sup>27</sup> Georgia is taking multiple initiatives to  
105 improve obstetric outcomes, including extending Medicaid coverage, introducing quality  
106 improvement initiatives, verifying levels of maternal care in Georgia hospitals, and  
107 expanding home visiting in rural counties.<sup>28</sup>

108  
109 First, we characterize regions as “obstetric care deserts” using two commonly used  
110 measures in the literature: (1) the March of Dimes “maternity care desert” measure<sup>15</sup>  
111 and (2) regions that are further than 50 miles from the closest hospital that provides  
112 CCO services. Upon defining a region as a desert or not, we report the total number of  
113 reproductive-aged women that live within an obstetric care desert under both measures.  
114 Finally, we analyze how many facilities would be needed in the state of Georgia to  
115 reduce the number of reproductive-aged women living in these obstetric deserts by 50%  
116 and 100%.

117  
118 The goal of this paper is to evaluate the responsiveness of two existing access to  
119 obstetric care measures to obstetric facility expansion. We hypothesize that obstetric  
120 facility expansion policies focused on reducing maternity care deserts are impractical  
121 and could have negative consequences. We analyze current measures of obstetric  
122 access, but do not recommend new access to care measures or recommend an  
123 obstetric facility expansion policy.

## 124 **2. Methods**

### 125 **2.1 Data Sources**

126 First, we collect data to infer the spatial distribution of obstetric healthcare facilities and  
127 providers, as well as the spatial distribution of subpopulations and communities that  
128 would demand obstetric services. The data sources used are described below.

129

#### 130 ***2.1.1 Location of Hospitals Providing Obstetric Care***

131 We include obstetric hospitals in Georgia that are classified as birth centers, or Perinatal  
132 Care Level 1, 2, or 3 hospitals according to the public records from Georgia's  
133 Department of Public Health from 2017.<sup>27</sup> The address of each obstetric hospital was  
134 verified by the study team by cross-referencing with Google Maps, and the latitude and  
135 longitude of each obstetric hospital were located using Python's geopy package.<sup>29</sup>

136

#### 137 ***2.1.3 Location of Demand for Obstetric Care***

138 To estimate the demand for obstetric care access, we used data from the American  
139 Community Survey (ACS) which provides population estimates for age and sex groups.  
140 We used the 2017 ACS 5-year estimates of the population of reproductive-aged women  
141 (18-44) in each census block group, which we assume is proportional to the demand for  
142 obstetric care in each block group. We used 5-year estimates because they are the  
143 most reliable and they are collected for all small geographies including census block  
144 groups. To estimate the location of this demand, we used the latitude and longitude of  
145 center of population of each census block group as reported by the U.S. Census Bureau  
146 in 2010.<sup>30</sup>

147

### 148 **2.1.2 Distance to Obstetric Care**

149 We calculated the distance between each obstetric hospital and each obstetric care  
150 demand point by calculating the great-circle distance in miles between the coordinates  
151 of each hospital and each census block group center of population.

152

## 153 **2.2 Measures of Obstetric Access**

154 We then determine which census block groups are defined to be obstetric deserts  
155 based on the measures outlined below.

156

### 157 **2.2.1 “Maternity Care Desert”**

158 We consider the March of Dimes definition of a “maternity care desert” which is defined  
159 to be a county that has zero hospitals or birth centers offering obstetric services and  
160 zero obstetric providers.<sup>15</sup> Because “maternity care deserts” are defined at the county  
161 level and the distance measure is defined at the census block group level, we deem any  
162 census block group in a “maternity care desert” county to be a “maternity care desert”  
163 census block group. We then use the following evaluation measures to compare these  
164 definitions.

165

### 166 **2.2.2 Distance to Critical Care Obstetric (CCO) Hospital**

167 We evaluate the distance from the center of population of each census block group to  
168 its nearest hospital offering CCO services. In line with previous studies,<sup>20</sup> we  
169 characterize hospitals as offering CCO services if they are designated as Level 3



170 obstetric hospitals. We refer to public reporting from Georgia’s Department of Public  
171 Health to characterize each hospital’s level of care.<sup>27</sup> We then use Great Circle  
172 distance<sup>29</sup> to evaluate whether the census block group population center is within the  
173 pre-specified distance threshold of 50 miles. A 50-mile threshold is commonly used  
174 because it estimates the widely accepted “Golden Hour”. The “Golden Hour” stems  
175 from trauma care, where it is thought that critically injured patients have better  
176 outcomes if they receive definitive care within an hour of their injuries,<sup>31</sup> although this  
177 threshold has not been validated for obstetric care.<sup>32,33</sup>

178

## 179 **2.3 Evaluation Metrics**

180 Using the measures above, we characterize each census block group as either having  
181 access to obstetric care or existing in an obstetric care desert.

182

### 183 ***2.3.1 Characterization of obstetric deserts***

184 First, we characterize the number of census block groups that are deemed to be  
185 obstetric care deserts based on the definitions (“maternity care desert”, > 50 miles from  
186 CCO services, and both a “maternity care desert” and > 50 miles from CCO services).  
187 We characterize the differences between the definitions of the populations that live in  
188 obstetric deserts in terms of demographics, including race, insurance, poverty, age, and  
189 marital status.

190

### 191 ***2.3.2 Other access measures for obstetric care deserts***

192 We characterize the distribution of distance to the closest obstetric hospital for different  
193 obstetric care desert definitions. We further characterize distance to care by Level of  
194 obstetric facility, calculating the driving time to the closest hospital offering Level 1, 2,  
195 and 3 care. We also determine the proportion of the population of obstetric care deserts  
196 that live in counties with an obstetric care facility (i.e., not a “maternity care desert”).

197

### 198 ***2.3.3 Evaluating the need for facility expansion to improve access***

199 We consider how many new facilities would hypothetically be needed to reduce the  
200 number of reproductive-aged women living in deserts by 50% and 100%. To do so, we  
201 use a *mathematical optimization* model drawing from the facility location literature (see  
202 Appendix). This optimization model determines the optimal placement of new obstetric  
203 facilities to minimize the number of reproductive-aged women living in deserts. This  
204 model unrealistically assumes that we can readily build obstetric facilities anywhere we  
205 want. We revisit this assumption in the discussion.

206

207 We consider both definitions of obstetric deserts in our optimization models. First, we  
208 investigate the number of new obstetric facilities that would hypothetically be required to  
209 reduce the number of women in “maternity care deserts” by a given percentage. To do  
210 so, we formulated a mathematical optimization model that minimized the total number of  
211 reproductive-aged women who live in obstetric deserts by introducing at most  $X$  new  
212 obstetric hospitals. This model returns the optimal location of these  $X$  new facilities.  
213 Here,  $X$  is a parameter than was varied to analyze the change in the number of  
214 reproductive-aged women living in obstetric deserts as more facilities are introduced.

215 We also investigate the number of lower-level obstetric facilities that would need to be  
216 upgraded to CCO to reduce the number of women living further than 50 miles from a  
217 CCO facility by a given percentage. We formulated a second mathematical optimization  
218 model that minimized the total number of reproductive-aged women living further than  
219 50 miles from CCO services by optimally choosing at most X existing obstetric hospitals  
220 to upgrade to CCO.

221

## 222 **3. Results**

### 223 **3.1. Characterization of obstetric deserts**

224 Figure 1 shows the regions that are designated as obstetric care deserts under the two  
225 definitions. In Georgia, there are 83 hospitals offering obstetric services. 56 counties  
226 that are deemed to be “maternity care deserts”, which contain a combined 524 census  
227 blocks. In comparison, 650 census block groups from 53 counties are deemed to be  
228 deserts using a 50-mile threshold.

229

230 Table 1 shows that out of the 1,910,308 reproductive-aged women who live in Georgia,  
231 104,158 (5.5%) live in “maternity care deserts”, 150,563 reproductive-aged women  
232 (7.9%) live more than (>) 50 miles from CCO services, and 38,202 (2.0%) live in both  
233 “maternity care desert” and > 50 miles from CCO services.

234

235 In Georgia, 14.8% of people do not have insurance and 14.9% of people have  
236 Medicaid. These proportions are higher for people who live in regions characterized as  
237 “maternity care deserts” (16.9%, 21.1%), > 50 miles from CCO services (17.2%,

238 20.4%), and regions designated as both (18.4%, 22.8%). Also, in Georgia, 16.9% of  
239 people have an income below the federal poverty line. This proportion is higher in  
240 regions characterized as “maternity care deserts” (23.7%), > 50 miles from CCO  
241 services (23.4%), and regions designated as both (25.1%).

### 242 **3.2 Other access measures for obstetric care deserts**

243 Table 2 shows the number of reproductive-aged women who live within the specified  
244 distance from obstetric services for each level of care. Of the 104,158 reproductive-  
245 aged women who live in “maternity care deserts”, 63% are within 50 miles of CCO  
246 services, 97% are within 50 miles of Level 2 care, and 100% are within 50 miles of any  
247 obstetric care facility. Of the 150,563 reproductive-aged women who live > 50 miles  
248 from CCO services, 98% are within 50 miles of Level 2 care, 100% are within 50 miles  
249 of any obstetric care facility, and 75% do not live in a maternity care desert. Of the  
250 1,806,150 reproductive-aged women who do not live in maternity care deserts, 93% are  
251 within 50 miles of CCO services. Similarly, of the 1,759,745 women who are within 50  
252 miles of CCO services, 96% live in a county with an obstetric care facility.

253

### 254 **3.3 Responsiveness to interventions**

255 Figure 2 shows the results of our optimization analysis. To hypothetically reduce the  
256 number of reproductive-aged women living in maternity care deserts by at least 50%, 16  
257 new obstetric hospitals would be required in counties that are currently maternity care  
258 deserts. This would be an increase of 19% over the 83 current number of facilities  
259 offering obstetric services and would reduce the number of reproductive-aged women  
260 living in maternity care deserts from 104,158 to 51,477. To eliminate maternity care

261 deserts in Georgia, 56 new obstetric hospitals would be required (a 67% increase in  
262 obstetric facilities; one facility for each county that is currently a maternity care desert).

263  
264 Our optimization analysis shows that to reduce the number of reproductive-aged women  
265 living 50 miles from CCO services by at least 50% (from 150,563 to 57,338  
266 reproductive-aged women) it would require upgrading 2 obstetric facilities to offer CCO  
267 services. To eliminate all census block groups that are > 50 miles from CCO services, a  
268 minimum of 8 facilities would need to be upgraded to offer CCO services.

269  
270 Figure 3 shows how many facilities are needed to reduce the number of reproductive-  
271 aged women to a specified level. The number of reproductive-aged women living in  
272 maternity care deserts does not decrease significantly with each expanded obstetric  
273 unit. In contrast, a small number of expanded CCO services dramatically reduces the  
274 number of reproductive-aged women living further than 50 miles from CCO services.

275

#### 276 **4. Discussion**

277 Access to care is an important dimension to consider in the context of the maternal  
278 health crisis in the United States. Our study analyzed the implications of using existing  
279 measures of access to obstetric care as key performance indicators to evaluate and  
280 track improvements in access.

281

282 In this paper, we analyzed two current measures of obstetric access, including the  
283 popular maternity care deserts measure. Maternity care deserts are counties in which

284 there are no obstetric providers or obstetric care facilities. This measure has been  
285 widely used in both academic literature and popular media, and it has drawn  
286 widespread attention to the lack of access to obstetric care in the US. Consistent with  
287 the March of Dimes report, we found that 5.5% of reproductive-aged women in Georgia  
288 live in the 56 counties designated as maternity care deserts (more than the national  
289 average, 3.5%).<sup>15</sup> We found that 7.9% of reproductive-aged women live further than 50  
290 miles from CCO services, which is less than a study using 2015 data which found that  
291 10.2% of reproductive-aged women live further than 50 miles from CCO services.<sup>20</sup> This  
292 difference may be due to a difference in distance metrics or the procedures for  
293 identifying the locations and levels of obstetric hospitals. We additionally found that  
294 2.0% of reproductive-aged women live in regions that are both maternity care deserts  
295 and further than 50 miles from CCO services.

296  
297 In our analysis, we considered the hypothetical implications of using current access  
298 measures to inform facility expansions, with the goal of evaluating these measures  
299 without concern for costs or workforce barriers. Our optimization model showed that  
300 eliminating maternity care deserts in Georgia would require at least 56 new obstetric  
301 hospitals. Doing so would increase the number of obstetric hospitals by 67%, from 83 to  
302 139. In contrast, ensuring all reproductive-age women in Georgia live within 50 miles of  
303 CCO services would require upgrading at least 8 lower-level hospitals to provide CCO  
304 services. Thus, these different measures of access imply very different strategies to  
305 expand access and imply very different estimates of how many obstetric facilities of  
306 different levels are needed in a geographic region.

307

308 Our findings suggest that additional tools are needed to provide estimates of how many  
309 facilities of each level of care are needed and can be sustained in a geographic region.

310 Ideally, the number of facilities, their level of care designations, and coordination should  
311 promote optimal pregnancy outcomes. Access is indeed an important dimension to this  
312 problem, as rural regions have been associated with greater probability of severe  
313 maternal morbidity and mortality,<sup>10</sup> and “maternity care deserts” associated with higher  
314 rates of preterm birth, infant mortality, low birth weight, and maternal mortality.<sup>16,17,34</sup>

315

316 However, the maternity care desert measure is highly dependent on the number of  
317 counties in a state. Counties were determined by territories and states without  
318 standardization, resulting in high variability in the number and size of counties across  
319 states.<sup>35</sup> For example, Georgia has the second most counties of any state (159), only  
320 behind Texas (254), although Georgia is the 8th most populated state in the US and  
321 24th largest by area. Thus, this measure may encourage a large number of obstetric  
322 units in Georgia simply because Georgia has a large number of counties, despite the  
323 fact that 82% of reproductive-aged women who live in maternity care deserts in Georgia  
324 live within 25 miles of an obstetric hospital.

325

326 Considering these measures of access alone could lead to unintended negative  
327 consequences. We showed that it would require a 67% increase in the number of  
328 obstetric hospitals to ensure no reproductive-aged women live in maternity care deserts  
329 in Georgia. Even if the economic forces would allow for so many obstetric facilities, a

330 maternal healthcare system with that many obstetric facilities could have unintended  
331 negative consequences due to the dilution of volume across many low-volume rural  
332 hospitals, which are known to be associated with poor pregnancy outcomes.<sup>36–39</sup>  
333 Moreover, staffing this many units would likely be very expensive and challenging given  
334 that there are already obstetric workforce shortages in Georgia.<sup>40</sup>

335  
336 While distance to CCO services could be a useful measure of access, this measure  
337 alone neither considers whether there are other nearby facilities that offer potentially  
338 sufficient lower-levels of obstetric care nor coordination between lower-level and CCO  
339 facilities. Thus, there are a variety of limitations in using measures of access alone to  
340 inform the number of facilities that are needed in a geographic region. These results  
341 motivate the need for access to maternity care measures that are capable of evaluating  
342 and tracking progress toward the reduction of lack of access. Additionally, these results  
343 motivate the need for additional methods and tools to estimate the number of facilities of  
344 different levels of care that are necessary and sustainable within a geographic region.

345  
346 Our study is not without limitations. We did not account for geographical barriers or  
347 traffic when calculating distance from the centroid of a census block group when  
348 computing whether the group is further than 50 miles from CCO services, and we did  
349 not account for measurement errors in the ACS. We did not account for other important  
350 barriers to access, such as transportation disadvantage and insurance coverage. We  
351 also did not account for out-of-state hospitals that offer obstetric services that could  
352 provide care to pregnant people in Georgia. Finally, our analysis only considered



353 potential access. Future work may investigate the impact of facility expansion on  
354 realized access to care, especially considering some patients prefer to bypass local  
355 hospitals to receive care elsewhere.<sup>41,42</sup>

356

## 357 **5. Conclusion**

358 Our findings suggest that the current measures of obstetric access, while useful for  
359 capturing certain dimensions of the maternal healthcare system, may not be useful for  
360 estimating the optimal number, designations, and coordination of obstetric care within a  
361 geographic region. Specifically, the maternity care desert measure is not a practical  
362 performance indicator of improvements to access to obstetric care. Thus, there is a  
363 need for tools that can track improvements and inform the appropriate number of  
364 obstetric care facilities that are needed in a geographic region. In addition, future work  
365 may examine how to optimally balance the cost and outcomes of expanding care,  
366 considering the trade-offs between increased access and loss of quality due to dilution  
367 and staffing issues, and incorporating alternate access expansion strategies such as  
368 home visits, telemedicine, and transportation programs.

369

## 370 **Declarations**

### 371 **Data Availability**

372 Georgia hospital data is available in public records from Georgia's Department of Public  
373 Health from 2017.<sup>27</sup> All Georgia block group population counts data are publicly  
374 available from the U.S. Census Bureau. Link:

375 [https://data.census.gov/all?q=acs&q=040XX00US13\\$1500000&y=2017](https://data.census.gov/all?q=acs&q=040XX00US13$1500000&y=2017). Georgia block  
376 group population centroids are publicly available from the U.S. Census Bureau. Link:  
377 [https://www.census.gov/geographies/reference-files/time-series/geo/centers-  
378 population.2010.html#list-tab-ZWAU50627XERV1TT2V](https://www.census.gov/geographies/reference-files/time-series/geo/centers-<br/>378 population.2010.html#list-tab-ZWAU50627XERV1TT2V). March of Dimes maternity care  
379 desert data is available in the March of Dimes report<sup>15</sup> and the March of Dimes  
380 maternity care deserts dashboard. Link: [https://www2.deloitte.com/us/en/pages/life-  
381 sciences-and-health-care/articles/march-of-dimes-maternity-care-deserts-  
382 dashboard.html](https://www2.deloitte.com/us/en/pages/life-<br/>381 sciences-and-health-care/articles/march-of-dimes-maternity-care-deserts-<br/>382 dashboard.html).

### 383 **Funding**

384 Research reported in this publication was supported in part by Imagine, Innovate and  
385 Impact (I3) from the Emory School of Medicine, Georgia Tech, by the Georgia CTSA  
386 NIH award (UL1-TR002378; Steimle) and by the National Science Foundation under  
387 grant number DGE-2039655 (Meredith); any opinions, findings, and conclusions or  
388 recommendations expressed in this material are those of the authors and do not  
389 necessarily reflect the views of the National Science Foundation.

### 390 **Acknowledgements**

391 The authors would like to thank Hengyi Hu and Abel Sapirstein for their assistance with  
392 the data collection and Dr. Debra Kane for her thoughtful comments throughout the  
393 analysis.

## 394 **References**

- 395 1. Hoyert DL. Maternal Mortality Rates in the United States, 2021. Published online 2023.
- 396 2. Maternal Mortality and Maternity Care in the United States Compared to 10 Other  
397 Developed Countries. doi:10.26099/411v-9255
- 398 3. Trost S, Beauregard J, Chandra G, et al. Pregnancy-Related Deaths: Data from Maternal  
399 Mortality Review Committees in 36 US States, 2017-2019.
- 400 4. Kozhimannil KB, Interrante JD, Tuttle MKS, Henning-Smith C. Changes in Hospital-Based  
401 Obstetric Services in Rural US Counties, 2014-2018. *JAMA*. 2020;324(2):197-199.  
402 doi:10.1001/jama.2020.5662
- 403 5. Kozhimannil KB, Interrante JD, Admon LK, Basile Ibrahim BL. Rural Hospital Administrators'  
404 Beliefs About Safety, Financial Viability, and Community Need for Offering Obstetric Care.  
405 *JAMA Health Forum*. 2022;3(3):e220204. doi:10.1001/jamahealthforum.2022.0204
- 406 6. Daymude AEC, Daymude JJ, Roachat R. Labor and Delivery Unit Closures in Rural Georgia from  
407 2012 to 2016 and the Impact on Black Women: A Mixed-Methods Investigation. *Matern Child*  
408 *Health J*. 2022;26(4):796-805. doi:10.1007/s10995-022-03380-y
- 409 7. Aubrey-Bassler FK, Cullen RM, Simms A, et al. Population-based cohort study of hospital  
410 delivery volume, geographic accessibility, and obstetric outcomes. *Int J Gynaecol Obstet Off*  
411 *Organ Int Fed Gynaecol Obstet*. 2019;146(1):95-102. doi:10.1002/ijgo.12832
- 412 8. Minion SC, Krans EE, Brooks MM, Mendez DD, Haggerty CL. Association of Driving Distance to  
413 Maternity Hospitals and Maternal and Perinatal Outcomes. *Obstet Gynecol*. 2022;140(5):812-  
414 819. doi:10.1097/AOG.0000000000004960
- 415 9. Ondusko DS, Liu J, Hatch B, Profit J, Carter EH. Associations between maternal residential  
416 rurality and maternal health, access to care, and very low birthweight infant outcomes. *J*  
417 *Perinatol*. 2022;42(12):1592-1599.
- 418 10. Kozhimannil KB, Interrante JD, Henning-Smith C, Admon LK. Rural-Urban Differences In  
419 Severe Maternal Morbidity And Mortality In The US, 2007–15. *Health Aff (Millwood)*.  
420 2019;38(12):2077-2085. doi:10.1377/hlthaff.2019.00805
- 421 11. Woodward R, Mazure ES, Belden CM, et al. Association of prenatal stress with distance  
422 to delivery for pregnant women in Western North Carolina. *Midwifery*. 2023;118:103573.  
423 doi:10.1016/j.midw.2022.103573
- 424 12. Thorsen ML, Harris S, McGarvey R, Palacios J, Thorsen A. Evaluating disparities in access  
425 to obstetric services for American Indian women across Montana. *J Rural Health*. Published  
426 online 2021:1-10. doi:10.1111/jrh.12572

- 427 13. Tanne JH. Nearly six million women in the US live in maternity care deserts. *BMJ*.  
428 2023;382:1878. doi:10.1136/bmj.p1878
- 429 14. National Academies of Sciences E and Medicine. *Advancing Maternal Health Equity and*  
430 *Reducing Maternal Morbidity and Mortality: Proceedings of a Workshop*. The National  
431 Academies Press; 2021. doi:10.17226/26307
- 432 15. *Nowhere to Go: Maternity Care Deserts across the US (Report No 3)*. March of Dimes;  
433 2022. <https://www.marchofdimes.org/maternity-care-deserts-report>
- 434 16. Wallace M, Dyer L, Felker-Kantor E, et al. Maternity Care Deserts and Pregnancy-  
435 Associated Mortality in Louisiana. *Womens Health Issues Off Publ Jacobs Inst Womens*  
436 *Health*. 2021;31(2):122-129. doi:10.1016/j.whi.2020.09.004
- 437 17. Waits JB, Smith L, Hurst D. Effect of Access to Obstetrical Care in Rural Alabama on  
438 Perinatal, Neonatal, and Infant Outcomes: 2003-2017. *Ann Fam Med*. 2020;18(5):446-451.  
439 doi:10.1370/afm.2580
- 440 18. Rayburn WF, Richards ME, Elwell EC. Drive times to hospitals with perinatal care in the  
441 United States. *Obstet Gynecol*. 2012;119(3):611-616. doi:10.1097/AOG.0b013e318242b4cb
- 442 19. Brantley MD, Davis NL, Goodman DA, Callaghan WM, Barfield WD. Perinatal  
443 regionalization: a geospatial view of perinatal critical care, United States, 2010–2013. *Am J*  
444 *Obstet Gynecol*. 2017;216(2):185.e1-185.e10. doi:10.1016/j.ajog.2016.10.011
- 445 20. Kroelinger CD, Brantley MD, Fuller TR, et al. Geographic access to critical care obstetrics  
446 for women of reproductive age by race and ethnicity. *Am J Obstet Gynecol*.  
447 2021;224(3):304.e1-304.e11. doi:10.1016/j.ajog.2020.08.042
- 448 21. Chong EKP, Zak SH. An Introduction to Optimization. *IEEE Antennas Propag Mag*.  
449 1996;38(2):60-. doi:10.1109/MAP.1996.500234
- 450 22. Daskin MS, Dean LK. Location of Health Care Facilities. In: Brandeau ML, Sainfort F,  
451 Pierskalla WP, eds. *Operations Research and Health Care: A Handbook of Methods and*  
452 *Applications*. International Series in Operations Research & Management Science. Springer  
453 US; 2004:43-76. doi:10.1007/1-4020-8066-2\_3
- 454 23. Pu Q, Yoo EH, Rothstein DH, Cairo S, Malemo L. Improving the spatial accessibility of  
455 healthcare in North Kivu, Democratic Republic of Congo. *Appl Geogr*. 2020;121:102262.  
456 doi:10.1016/j.apgeog.2020.102262
- 457 24. Griffin PM, Scherrer CR, Swann JL. Optimization of community health center locations  
458 and service offerings with statistical need estimation. *IIE Trans*. 2008;40(9):880-892.  
459 doi:10.1080/07408170802165864

- 460 25. Ahmadi-Javid A, Seyedi P, Syam SS. A survey of healthcare facility location. *Comput Oper*  
461 *Res.* 2017;79:223-263. doi:10.1016/j.cor.2016.05.018
- 462 26. Hernandez ND, Aina AD, Baker LJ, et al. Maternal health equity in Georgia: a Delphi  
463 consensus approach to definition and research priorities. *BMC Public Health.* 2023;23(1):596.  
464 doi:10.1186/s12889-023-15395-3
- 465 27. Perinatal Health Unit. Core Requirements and Recommended Guidelines for Designated  
466 Regional Perinatal Centers Maternal & Child Health Section Office of Family and Community  
467 Health Perinatal Health Unit. 2013;(April).
- 468 28. *2018-2020 Maternal Mortality Report.* Georgia Department of Public Health
- 469 29. GeoPy Documentation.
- 470 30. *Centers of Population Computation for the United States. 1950 - 2010.* Geography  
471 Division, U.S. Census Bureau
- 472 31. Kidher E, Krasopoulos G, Coats T, et al. The effect of prehospital time related variables  
473 on mortality following severe thoracic trauma. *Injury.* 2012;43(9):1386-1392.  
474 doi:10.1016/j.injury.2011.04.014
- 475 32. Lerner EB, Moscati RM. The golden hour: scientific fact or medical “urban legend”? *Acad*  
476 *Emerg Med Off J Soc Acad Emerg Med.* 2001;8(7):758-760. doi:10.1111/j.1553-  
477 2712.2001.tb00201.x
- 478 33. Rogers FB, Rittenhouse KJ, Gross BW. The golden hour in trauma: dogma or medical  
479 folklore? *Injury.* 2015;46(4):525-527. doi:10.1016/j.injury.2014.08.043
- 480 34. Kozhimannil KB, Hung P, Henning-Smith C, Casey MM, Prasad S. Association Between  
481 Loss of Hospital-Based Obstetric Services and Birth Outcomes in Rural Counties in the United  
482 States. *JAMA.* 2018;319(12):1239-1247. doi:10.1001/jama.2018.1830
- 483 35. States, Counties, and Statistical Equivalent Entities. In: *Geographic Areas Reference*  
484 *Manual.* U.S. Census Bureau.
- 485 36. Snowden JM, Cheng YW, Emeis CL, Caughey AB. The impact of hospital obstetric volume  
486 on maternal outcomes in term, non–low-birthweight pregnancies. *Am J Obstet Gynecol.*  
487 2015;212(3):380.e1-380.e9. doi:10.1016/j.ajog.2014.09.026
- 488 37. Janakiraman V, Lazar J, Joynt KE, Jha AK. Hospital Volume, Provider Volume, and  
489 Complications After Childbirth in U.S. Hospitals. *Obstet Gynecol.* 2011;118(3):521.  
490 doi:10.1097/AOG.0b013e31822a65e4

- 491 38. Kyser KL, Lu X, Santillan DA, et al. The association between hospital obstetrical volume  
492 and maternal postpartum complications. *Am J Obstet Gynecol*. 2012;207(1):42.e1-42.e17.  
493 doi:10.1016/j.ajog.2012.05.010
- 494 39. Clapp MA, James KE, Kaimal AJ. The effect of hospital acuity on severe maternal  
495 morbidity in high-risk patients. *Am J Obstet Gynecol*. 2018;219(1):111.e1-111.e7.  
496 doi:10.1016/j.ajog.2018.04.015
- 497 40. Zertuche A, Spelke B. Georgia's General Assembly Joint Study Committee on Medicaid  
498 Reform: Georgia's Obstetric Care Shortage.
- 499 41. Carrel M, Keino BC, Novak NL, Ryckman KK, Radke S. Bypassing of nearest labor &  
500 delivery unit is contingent on rurality, wealth, and race. *Birth*. 2023;50(1):5-10.  
501 doi:10.1111/birt.12712
- 502 42. Thorsen ML, Harris S, Palacios J, McGarvey R, Thorsen A. American Indians Travel Great  
503 Distances for Obstetrical Care: Examining Rural and Racial Disparities. *Soc Sci Med*.  
504 (Forthcoming).
- 505

## Tables and Figures

**Figure 1.** Current state of obstetric care deserts in Georgia under different definitions (A) Maternity Care Deserts, (B) > 50-miles from CCO services, (C) both Maternity Care Desert and > 50-miles from CCO services

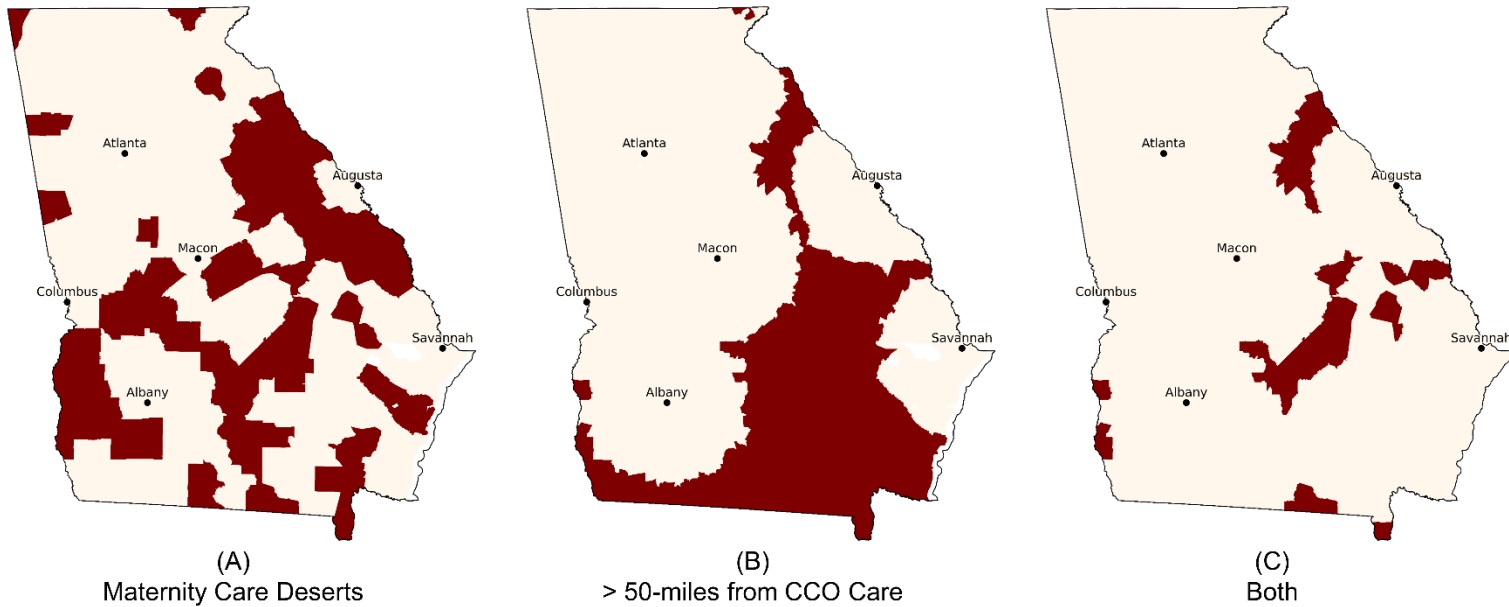

**Figure 2.** The number of obstetric facilities needed to be expanded to reduce the number of reproductive-aged women in obstetric deserts by 50% and 100%.

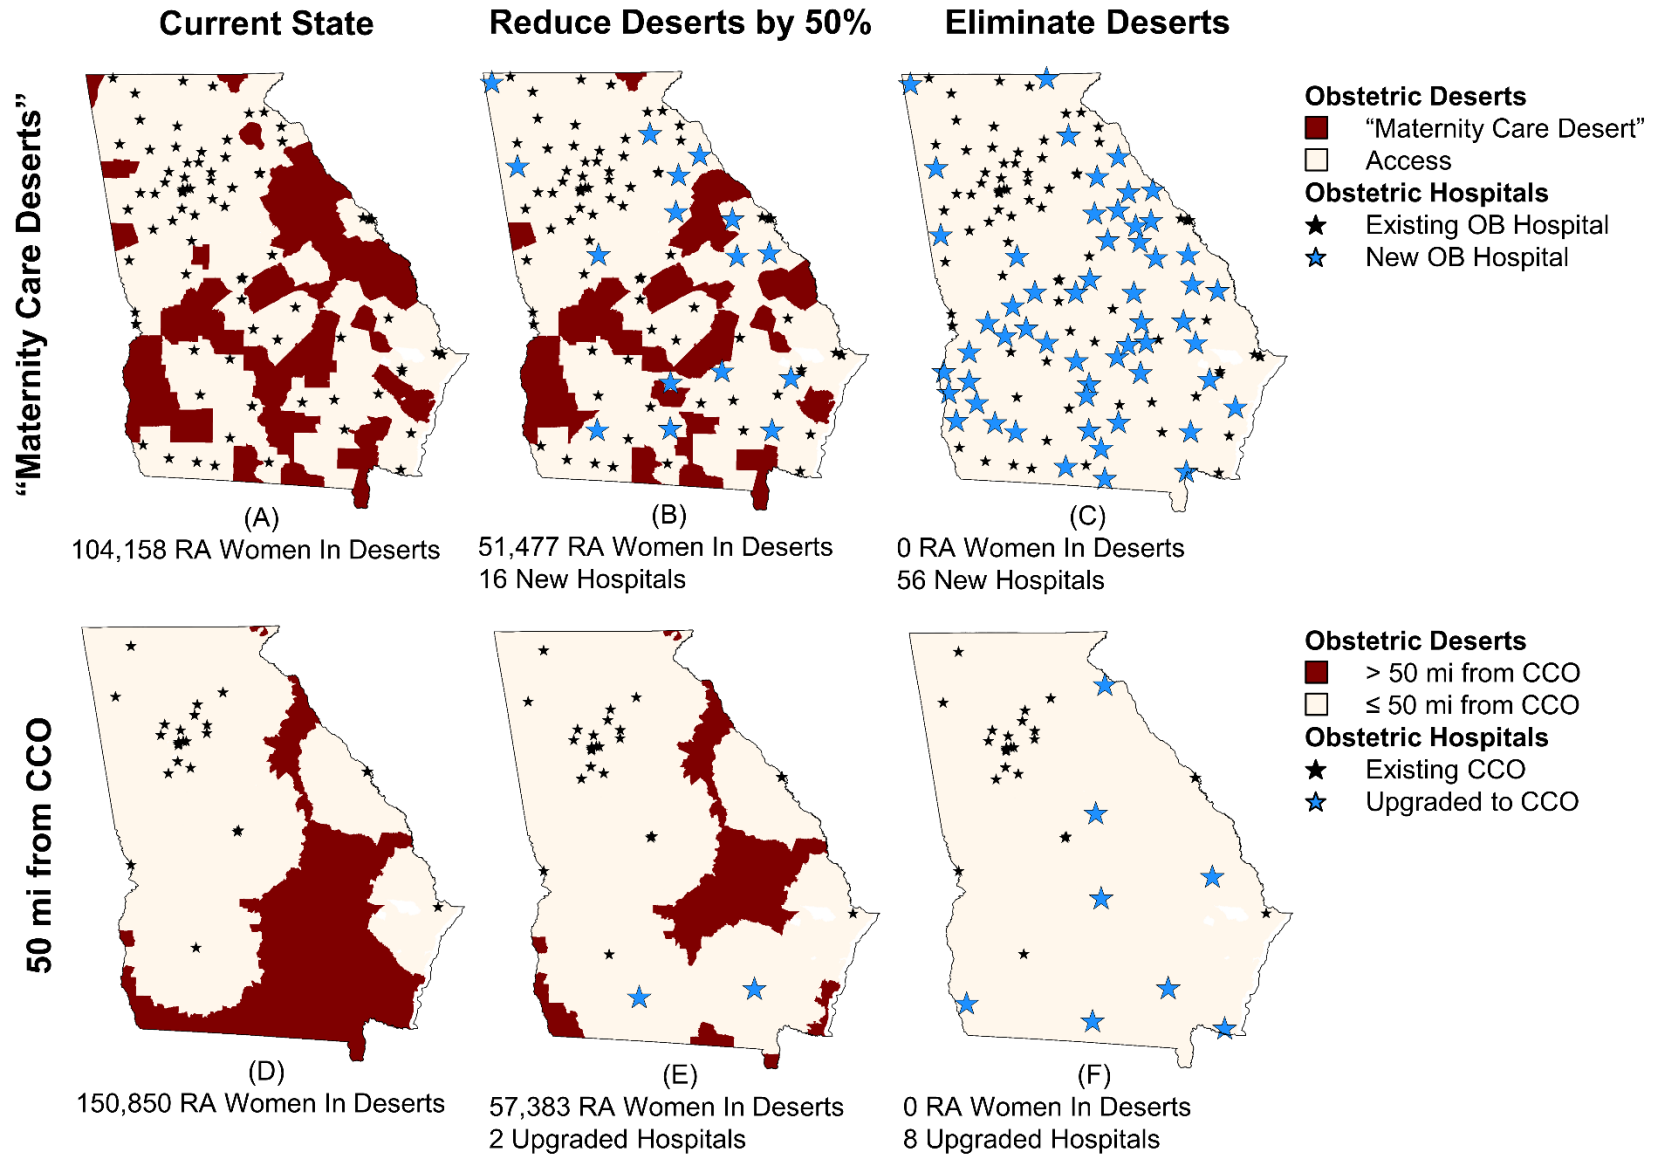



**Figure 3.** The number of obstetric care facilities needed to reduce the number of reproductive-aged (RA) women in obstetric deserts based on two different definitions of obstetric care deserts.

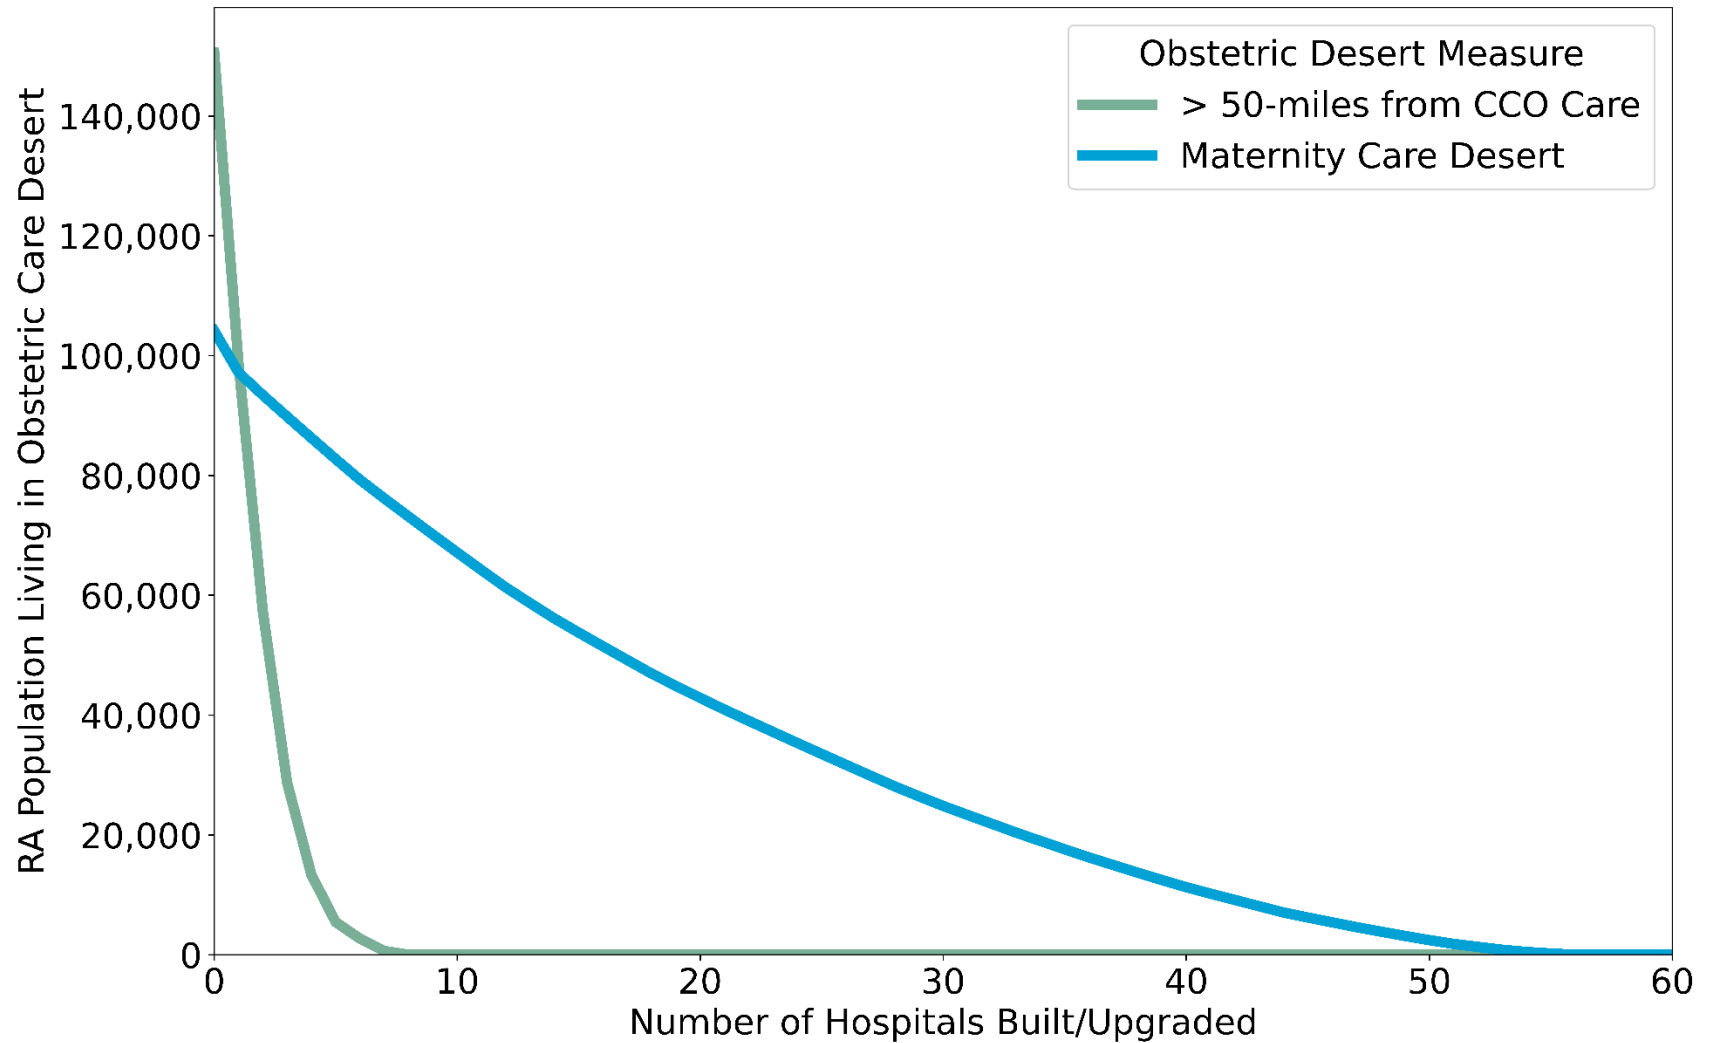

**Table 1.** The characteristics of all people who live in Georgia by obstetric regions and the ages of reproductive-aged females by obstetric desert region.

| <b>Characteristics of Georgia Population by Obstetric Desert Region</b> |                            |                        |                              |                                                   |
|-------------------------------------------------------------------------|----------------------------|------------------------|------------------------------|---------------------------------------------------|
|                                                                         | Georgia Overall            | Maternity Care Desert  | > 50 miles from CCO Services | Maternity Care Desert & > 50 mi from CCO Services |
| <b>Total Population</b>                                                 | <b>10,201,635 (100.0%)</b> | <b>670,558 (6.6%)</b>  | <b>890,237 (8.7%)</b>        | <b>247,074 (2.4%)</b>                             |
| <b>Race</b>                                                             |                            |                        |                              |                                                   |
| White                                                                   | 6,061,821 (59.4%)          | 427,994 (63.8%)        | 585,792 (65.8%)              | 164,592 (66.6%)                                   |
| Black/African American                                                  | 3,195,268 (31.3%)          | 210,003 (31.3%)        | 255,866 (28.7%)              | 71,646 (29.0%)                                    |
| American Indian/Alaska Native                                           | 30,552 (0.3%)              | 1,540 (0.2%)           | 2,583 (0.3%)                 | 712 (0.3%)                                        |
| Asian                                                                   | 388,946 (3.8%)             | 4,031 (0.6%)           | 7,872 (0.9%)                 | 1,180 (0.5%)                                      |
| Native Hawaiian/Pacific Islander                                        | 5,237 (0.1%)               | 569 (0.1%)             | 264 (0.0%)                   | 54 (0.0%)                                         |
| Other                                                                   | 282,570 (2.8%)             | 16,151 (2.4%)          | 21,521 (2.4%)                | 5,600 (2.3%)                                      |
| Multiracial                                                             | 237,241 (2.3%)             | 10,270 (1.5%)          | 16,339 (1.8%)                | 3,290 (1.3%)                                      |
| <b>Ethnicity</b>                                                        |                            |                        |                              |                                                   |
| Hispanic/Latino                                                         | 950,380 (9.3%)             | 37,438 (5.6%)          | 57,444 (6.5%)                | 16,797 (6.8%)                                     |
| <b>Insurance</b>                                                        |                            |                        |                              |                                                   |
| No Insurance                                                            | 1,481,625 (14.8%)          | 108,443 (16.9%)        | 146,234 (17.2%)              | 43,264 (18.4%)                                    |
| Medicaid                                                                | 1,491,181 (14.9%)          | 135,480 (21.1%)        | 173,232 (20.4%)              | 53,606 (22.8%)                                    |
| <b>Poverty</b>                                                          | 1,679,030 (16.9%)          | 150,938 (23.7%)        | 198,171 (23.4%)              | 58,789 (25.1%)                                    |
| <b>Total Female Reproductive-aged (18-44)</b>                           | <b>1,910,308 (18.7%)</b>   | <b>104,158 (15.5%)</b> | <b>150,563 (16.9%)</b>       | <b>38,202 (15.5%)</b>                             |
| 18-24                                                                   | 492,292 (25.8%)            | 27,149 (26.1%)         | 41,512 (27.6%)               | 9,662 (25.3%)                                     |
| 25-34                                                                   | 709,387 (37.1%)            | 37,555 (36.1%)         | 55,886 (37.1%)               | 13,856 (36.3%)                                    |
| 35-44                                                                   | 708,629 (37.1%)            | 39,454 (37.9%)         | 53,165 (35.3%)               | 14,684 (38.4%)                                    |

**Table 2.** The number and proportion of the reproductive-aged women who live in Georgia overall and in an obstetric desert who live within the specified distance threshold of each level of obstetric care.

| <b>Reproductive-Aged Women Who Live Within Distance of Obstetric Care, N (%)</b> |                      |                                 |                               |                                  |                               |                                  |
|----------------------------------------------------------------------------------|----------------------|---------------------------------|-------------------------------|----------------------------------|-------------------------------|----------------------------------|
| <b>Distance from Obstetric Care</b>                                              |                      | Georgia Overall                 | Maternity Care Deserts        | Not in Maternity Care Deserts    | > 50 miles from CCO services  | ≤ 50 miles from CCO services     |
| <b>Distance</b>                                                                  | <b>Level of Care</b> | <b>N = 1,910,308<br/>(100%)</b> | <b>N = 104,158<br/>(5.5%)</b> | <b>N = 1,806,150<br/>(94.5%)</b> | <b>N = 150,563<br/>(7.9%)</b> | <b>N = 1,759,745<br/>(92.1%)</b> |
| 25 miles                                                                         | 1                    | 1,194,235 (62%)                 | 41,860 (40%)                  | 1,152,375 (63%)                  | 80,529 (53%)                  | 1,113,706 (63%)                  |
|                                                                                  | 2                    | 1,546,787 (80%)                 | 54,577 (52%)                  | 1,492,210 (82%)                  | 86,879 (57%)                  | 1,459,908 (82%)                  |
|                                                                                  | 3                    | 1,490,107 (78%)                 | 17,789 (17%)                  | 1,472,318 (81%)                  | 0 (0%)                        | 1,490,107 (84%)                  |
|                                                                                  | Any                  | 1,883,936 (98%)                 | 85,763 (82%)                  | 1,798,173 (99%)                  | 140,714 (93%)                 | 1,743,222 (99%)                  |
| 50 miles                                                                         | 1                    | 1,791,838 (93%)                 | 86,719 (83%)                  | 1,705,119 (94%)                  | 132,182 (87%)                 | 1,659,656 (94%)                  |
|                                                                                  | 2                    | 1,898,528 (99%)                 | 101,364 (97%)                 | 1,797,164 (99%)                  | 148,257 (98%)                 | 1,750,271 (99%)                  |
|                                                                                  | 3                    | 1,759,745 (92%)                 | 65,956 (63%)                  | 1,693,789 (93%)                  | 0 (0%)                        | 1,759,745 (100%)                 |
|                                                                                  | Any                  | 1,910,308 (100%)                | 104,158 (100%)                | 1,806,150 (100%)                 | 150,563 (100%)                | 1,759,745 (100%)                 |
| 100 miles                                                                        | 1                    | 1,910,308 (100%)                | 104,158 (100%)                | 1,806,150 (100%)                 | 150,563 (100%)                | 1,759,745 (100%)                 |
|                                                                                  | 2                    | 1,910,308 (100%)                | 104,158 (100%)                | 1,806,150 (100%)                 | 150,563 (100%)                | 1,759,745 (100%)                 |
|                                                                                  | 3                    | 1,909,715 (99%)                 | 103,630 (99%)                 | 1,806,085 (99%)                  | 149,970 (99%)                 | 1,759,745 (100%)                 |
|                                                                                  | Any                  | 1,910,308 (100%)                | 104,158 (100%)                | 1,806,150 (100%)                 | 150,563 (100%)                | 1,759,745 (100%)                 |
| <b>Not in Maternity Care Deserts</b>                                             |                      | 1,806,150 (95%)                 | 0 (0%)                        | 1,806,150 (100%)                 | 112,361 (75%)                 | 1,693,789 (96%)                  |

## Appendix: Mathematical optimization models

In this appendix, we present our mathematical optimization models used to compare policy interventions. This decision-analytic approach provides a way to optimally allocate resources (e.g., facility expansions) across a system in a way that considers constraints (e.g., no more than 4 facilities can be expanded) and the objectives of the decision-makers (e.g., minimize the number of reproductive-aged (RA) women living in deserts).

### **Minimize the number of reproductive-aged women who live in obstetric deserts**

We consider a set of counties  $\mathcal{C} = \{1, 2, \dots, C\}$  and a set of census block groups  $\mathcal{B} = \{1, 2, \dots, B\}$ . The population of reproductive-aged women in census block group  $b$  is denoted by  $p_b$ . We use an indicator  $\beta_{bc}$  which takes on a value of 1 if census block group  $b$  is within county  $c$ . We use  $q_c = 1$  to indicate if county  $c$  has no obstetric providers practicing within the county. We use an indicator  $x_c^0$  which takes on a value of 1 if county  $c$  has no hospital or birth center providing obstetric care within the county.

For a county to be considered a “maternity care desert”, it must have no obstetric providers practicing and no hospital or birth center providing obstetric care within the county.

We consider whether the county is an “maternity care desert” or not using an indicator  $d_c$  denoting that county  $c$  is a desert ( $d_c = 1$  indicates that county  $c$  is a desert while  $d_c = 0$  indicates that county  $c$  is not a desert). If a county is an “maternity care desert”,

then all block groups within the county are also obstetric deserts. We indicate if a block group is an obstetric care desert using an indicator  $d_b$  ( $d_b = 1$  indicates that census block group  $b$  is a desert while  $d_b = 0$  indicates that census block group  $b$  is not a desert). Thus, the total number of women who currently live in obstetric deserts is given by:  $\sum_{i=1}^B p_b d_b$ .

To consider the impact of policy interventions, we consider the possibility that hospitals can be expanded to provide obstetric services. We designate *decision variables*  $x_c \in \{0,1\}$  such that  $x_c = 1$  means county  $c$  has a hospital or birth center providing obstetric care after infrastructure is expanded. We consider a *constraint* that we can expand at most  $F$  facilities to provide obstetric care:  $\sum_{c=1}^C (x_c - x_c^0) \leq F$ . We also consider a set of *constraints* that each county is considered a desert if it has no obstetric providers and no hospital or birth centers within the county:  $d_c \geq q_c + x_c - 1$ . Further, we add another set of *constraints* that each block group is considered a desert only if it is within a county that is a desert:  $d_b \geq \sum_{c=1}^C d_c \beta_{bc}$ . Finally, we add a set of *constraints*  $x_c \geq x_c^0$  which enforce that no county can be downgraded such that they no longer have a hospital or birth center providing obstetric services.

Our optimization model will select the values of the decision variables that satisfy the constraints in order to minimize our objective function. To minimize the total number of reproductive-aged women in obstetric deserts, we will minimize the following objective function:

$$\text{minimize}_x \sum_{b=1}^B p_b d_b$$

Thus, our final optimization model is:

$$\text{minimize}_x \sum_{b=1}^B p_b d_b$$

Subject to:

$$\sum_{c=1}^C (x_c - x_c^0) \leq F$$

$$d_b \geq (q_c + x_c) - 1, \quad \forall c \in \mathcal{C}$$

$$d_b \geq \sum_{c=1}^C d_c \beta_{bc}, \quad \forall b \in \mathcal{B}$$

$$x_c \geq x_c^0, \quad \forall h \in \mathcal{H}$$

$$x_c \in \{0,1\}, \quad \forall c \in \mathcal{C}$$

$$d_c \in \{0,1\}, \quad \forall c \in \mathcal{C}$$

$$d_b \in \{0,1\}, \quad \forall b \in \mathcal{B}$$

We can solve this problem quickly by ranking the counties in terms of  $p_c$  and selecting the B largest values. We solve this problem for a range of F values ( $F = 1, 2, 3, \dots$ ) to evaluate how the number of maternity care deserts changes.

### **Minimize the number of women of who live more than 50 miles from CCO services**

We consider a set of census block groups  $\mathcal{B} = \{1, 2, \dots, B\}$ , and the population of reproductive-aged women in census block group  $b$  is denoted by  $p_b$ . We also consider a set of obstetric hospitals  $\mathcal{H} = \{1, 2, \dots, H\}$ . We use an indicator  $x_h^0$  which takes on a value of 1 if hospital  $h$  provides CCO services. We use an indicator  $\alpha_{bh}$  which takes on a value of 1 if census block group  $b$  is within 50 miles of hospital  $h$ .

To consider the impact of policy interventions, we allow hospitals that do not provide CCO services to be upgraded to provide CCO services. We consider *decision variables*  $x_h \in \{0, 1\}$  such that  $x_h = 1$  indicates that hospital  $h$  provides CCO services after upgrades. Then, we add *constraints* to enforce that a census block group is deemed a desert if it is  $> 50$  miles from CCO services ( $d_b = 1$  indicates that census block group  $b$  is a desert while  $d_b = 0$  indicates that census block group  $b$  is not a desert). Thus, the total number of women who currently live in obstetric deserts is given by:  $\sum_{b=1}^B p_b d_b$ . We consider a *constraint* that we can upgrade at most  $F$  facilities to provide critical care obstetric services:  $\sum_{h=1}^H (x_h - x_h^0) \leq F$ . Further, we add a set of constraints  $d_b \geq 1 - \sum_{h=1}^H \alpha_{bh} x_h$  which enforce that a census block group is considered a desert if it is  $> 50$  miles from its nearest obstetric hospital offering CCO services. Finally, we add a set of constraints  $x_h \geq x_h^0$  which enforce that no hospitals can be downgraded such that they no longer provide CCO services.

Our optimization model will select the values of the decision variables that satisfy the constraints in order to minimize our objective function. To minimize the total number of

reproductive-aged women in obstetric deserts, we will minimize the following objective function:

$$\text{minimize}_{x,d} \sum_{b=1}^B p_b d_b$$

Thus, our final optimization model is:

$$\text{minimize}_{x,d} \sum_{b=1}^B p_b d_b$$

Subject to:

$$\sum_{h=1}^H (x_h - x_h^0) \leq F$$

$$d_b \geq 1 - \sum_{h=1}^H \alpha_{ch} x_h, \quad \forall b \in \mathcal{B}$$

$$x_h \geq x_h^0, \quad \forall h \in \mathcal{H}$$

$$x_h \in \{0,1\}, \quad \forall h \in \mathcal{H}$$

$$d_b \in \{0,1\}, \quad \forall b \in \mathcal{B}$$

We solve this problem for a range of  $F$  values.
